# Supplementary material for: Effect of different phosphatidylcholines on high fat diet-induced insulin resistance in mice
Source: Royal Society of Chemistry journal article supplement (doi:10.1039/d0fo02632h), 2021-01-01
Supplement: d0fo02632h1.pdf [file d0fo02632h1.pdf]

1 **Supplemental Tables**

2 **Supplemental Table 1 . Fatty acid composition of the employed PCs and fish oil**

| Fatty acid (%) | EPA/DHA-<br>PC | Soy-PC | Egg-PC | EPA/DHA-<br>TG |
|----------------|----------------|--------|--------|----------------|
| C14:0          | 0.99           | 0.43   | 0.23   | 5.86           |
| C16:0          | 23.48          | 14.9   | 28.15  | 19.56          |
| C16:1 n-9      | 2.36           | 1.02   | 2.59   | 3.27           |
| C18:0          | 11.15          | 3.09   | 21.57  | 6.45           |
| C18:1n-9       | 9.08           | 9.96   | 27.17  | 12.12          |
| C18:2n-6       | 0.39           | 59.13  | 11.32  | 4.10           |
| C18:3n-6       | --             | 0.19   | 0.39   | 4.23           |
| C18:3n-3       | --             | 6.75   | 1.57   | --             |
| C20:1n-9       | 12.48          | 1.37   | 1.49   | 1.52           |
| C20:4n-6       | 1.82           | 1.21   | 3.71   | 1.25           |
| C20:5(EPA)     | 9.72           | --     | --     | 10.04          |
| C22:6(DHA)     | 27.11          | --     | --     | 30.32          |

3 *Note: "--", none detected;*

4  
5  
6  
7  
8  
9  
10  
11  
12  
13  
14  
15  
16  
17  
18  
19  
20  
21  
22  
23  
24  
25

26

27

**Supplemental Table 2.** Composition of experimental diets

| Ingredients (g/kg) | Con | HF  | EPA/DHA-<br>PC | Soy-PC | Egg-PC | EPA/DHA-<br>TG |
|--------------------|-----|-----|----------------|--------|--------|----------------|
| Casein             | 200 | 200 | 200            | 200    | 200    | 200            |
| Cornstarch         | 450 | 250 | 250            | 250    | 250    | 250            |
| Sucrose            | 200 | 200 | 200            | 200    | 200    | 200            |
| Corn oil           | 50  | 50  | 50             | 50     | 50     | 50             |
| Lard               | 0   | 200 | 180            | 180    | 180    | 180            |
| Mineral mix        | 35  | 35  | 35             | 35     | 35     | 35             |
| Vitamin mix        | 10  | 10  | 10             | 10     | 10     | 10             |
| Cellulose          | 50  | 50  | 50             | 50     | 50     | 50             |
| Choline bitartrate | 2   | 2   | 2              | 2      | 2      | 2              |
| DL-methionine      | 3   | 3   | 3              | 3      | 3      | 3              |
| EPA/DHA-PC         | --  | --  | 20             | --     | --     | --             |
| Soy-PC             | --  | --  | --             | 20     | --     | --             |
| Egg-PC             | --  | --  | --             | --     | 20     | --             |
| Fish oil           | --  | --  | --             | --     | --     | 20             |

28

29

30

31

32

33

34

35

36

37

**Supplemental Table 3.** Effect of different PCs treatment on fatty acid composition in serum of the Mice

| Fatty acid (%) | Con                     | HF           | EPA/DHA-PC   | Soy-PC       | Egg-PC     | EPA/DHA-TG   |
|----------------|-------------------------|--------------|--------------|--------------|------------|--------------|
| C14:0          | 0.47±0.13               | 0.25±0.12    | 0.16±0.17    | 0.19±0.11    | 0.19±0.30  | 0.25         |
| C15:0          | 0.32±0.13               | 0.17±0.09    | 0.11±0.09    | 0.13±0.16    | 0.14±0.13  | 0.12±0.12    |
| C16:0          | 20.21±4.45              | 19.37±1.96   | 18.91±1.77   | 16.47±1.84   | 19.19±2.80 | 18.71±1.44   |
| C16:1n-9       | 1.88±0.44               | 1.22±0.31*   | 1.51±0.62    | 1.31±0.54    | 1.26±0.43  | 1.32±0.71    |
| C17:0          | 1.35±0.56               | 1.42±0.33    | 1.23±0.21    | 1.34±0.16    | 1.19±0.32  | 1.14±0.44    |
| C17:1n-7       | 0.23±0.09               | 0.17±0.05    | 0.17±0.07    | 0.14±0.09    | 0.16±0.07  | 0.14±0.08    |
| C18:0          | 10.19±0.97              | 18.23±2.13** | 15.34±2.09   | 17.20±1.78   | 16.76±2.36 | 16.42 ±1.99  |
| C18:1n-9       | 22.44±4.35              | 26.05±2.03   | 21.88±3.09   | 22.91±2.10   | 25.37±2.89 | 23.42±3.01   |
| C18:2n-6       | 24.68±4.90 <sup>a</sup> | 10.28±1.43** | 11.58±2.33   | 18.68±3.18## | 11.59±2.10 | 11.15±2.77   |
| C18:3n-6       | 0.25±0.41               | 0.16±0.11    | 0.13±0.14    | 0.10±0.19    | 0.12±0.11  | 0.18±0.14    |
| C18:3n-3       | 1.37±0.38 <sup>a</sup>  | 0.29±0.12**  | 0.23±0.11    | 0.38±0.13#   | 0.42±0.29  | 0.22±0.22    |
| C20:0          | 0.90±1.03               | 0.47±0.17    | 0.33±0.21    | 0.27±0.22    | 0.22±0.19  | 0.31±0.27    |
| C20:1n-9       | 1.20±0.35               | 0.93±0.41    | 1.20±0.44    | 0.99±0.31    | 1.13±0.56  | 1.18±0.47    |
| C20:2n-6       | 0.72±0.44               | 0.51±0.22    | 0.51±0.32    | 0.43±0.36    | 0.64±0.38  | 0.66±0.23    |
| C20:3n-6       | 1.05±0.41               | 2.35±1.02    | 1.85±0.64    | 1.93±0.42    | 2.46±1.33  | 1.71±0.77    |
| C20:4n-6       | 7.19±1.54               | 11.25±2.39*  | 8.49±1.45#   | 10.74±1.34   | 13.14±1.19 | 7.86±2.16#   |
| C22:0          | 0.99±0.46               | 0.82±0.38    | 0.66±0.52    | 0.68±0.25    | 0.49±0.22  | 0.52±0.24    |
| C20:5n-3       | 0.12±0.11               | 0.15± 0.10   | 4.97±0.41##  | 0.18±0.12    | 0.52±0.40  | 4.12±0.22##  |
| C22:1n-9       | 0.47±0.21               | 0.73±0.43    | 0.72±0.44    | 0.65±0.31    | 0.61±0.60  | 0.74±0.47    |
| C22:6n-3       | 3.97±0.40               | 5.18±0.70*   | 10.02±1.27## | 5.28±0.89    | 4.40±1.07  | 9.83±0.97##  |
| Total SFA      | 34.43±1.39              | 40.73±1.71*  | 36.74±1.93#  | 36.28±1.22#  | 38.18±2.19 | 37.47±1.33   |
| Total MUFA     | 26.22±1.96              | 29.10±1.52   | 25.48±1.84   | 26.00±1.60   | 28.53±1.72 | 26.80±1.96   |
| Total PUFA     | 39.35±1.67              | 30.17±1.66** | 37.78±1.21## | 37.72±2.06## | 33.29±1.53 | 35.73±1.82   |
| Total n-6      | 33.89±1.45              | 24.55±1.77** | 22.56±1.82   | 31.88±1.69## | 27.95±1.73 | 21.56±1.58   |
| PUFA           |                         |              |              |              |            |              |
| Total n-3      | 5.46±1.40               | 5.62±1.04    | 15.22±1.28## | 5.84±1.07    | 5.34±1.03  | 14.17±1.31## |
| PUFA           |                         |              |              |              |            |              |

40

41 Results are presented as means ± SD

42 \**p* < 0.05, \*\**p* < 0.01 compared to Con group. #*p* < 0.05, ##*p* < 0.01 compared to HF group.

43 SFA, saturated fatty acids; MUFA, monounsaturated fatty acids; PUFA, polyunsaturated fatty acids; ND, not detected.

44

45

46

47

48

49

50

51

52

53

54  
55  
56  
57  
58  
59

**Supplemental Table 4.** Effect of different PCs treatment on Fatty acid composition in liver of HFD Fed Mice

| Fatty acid (%) | Con        | HF           | EPA/DHA-PC   | Soy-PC       | Egg-PC     | EPA/DHA-TG   |
|----------------|------------|--------------|--------------|--------------|------------|--------------|
| C14:0          | 0.29±0.06  | 0.21±0.05    | 0.16±0.10    | 0.16±0.07    | 0.16±0.11  | 0.16±0.06    |
| C15:0          | 0.12±0.05  | 0.11±0.03    | 0.08±0.03    | 0.09±0.08    | 0.24±0.16  | 0.04±0.02    |
| C16:0          | 17.21±1.88 | 15.25±1.56   | 16.05±1.49   | 14.10±1.66   | 12.96±2.35 | 14.06±1.98   |
| C16:1n-9       | 3.11±0.63  | 2.51±0.58    | 1.84±1.03    | 1.07±1.12    | 1.27±0.84  | 1.28±0.77    |
| C17:0          | 0.81±0.12  | 1.05±0.13    | 1.25±0.13    | 0.94±0.08    | 1.02±0.13  | 1.89±0.10    |
| C17:1          | 0.19±0.04  | 0.18±0.03    | 0.12±0.03    | 0.13±0.04    | 0.16±0.05  | 0.24±0.03    |
| C18:0          | 10.19±1.11 | 16.90±1.82** | 16.62±1.54   | 17.11±1.66   | 19.48±2.01 | 18.41±1.74   |
| C18:1n-9       | 31.07±2.32 | 27.26±2.99   | 26.61±3.13   | 26.79±2.09   | 28.11±2.73 | 26.24±2.86   |
| C18:2n-6       | 18.26±1.27 | 16.26±1.56   | 14.81±2.01   | 19.48±1.31## | 15.21±1.42 | 15.13±1.37   |
| C18:3n-6       | 0.87±0.10  | 0.24±0.07**  | 0.12±0.10    | 0.25±0.06    | 0.27±0.05  | 0.24±0.04    |
| C18:3n-3       | 1.26±0.33  | 0.33±0.15**  | 0.13±0.11    | 0.63±0.22##  | 0.55±0.27  | 0.25±0.13    |
| C20:1n-9       | 1.89±0.45  | 2.2±0.48     | 1.25±0.36    | 1.81±0.31    | 2.29±0.42  | 1.42±0.29    |
| C20:2n-6       | 0.92±0.11  | 1.2±0.20     | 0.69±0.17    | 0.9±0.21     | 1.15±0.32  | 0.82±0.18    |
| C20:3n-6       | 1.49±0.23  | 2.04±0.39    | 1.5±0.42     | 1.42±0.37    | 1.61±0.36  | 1.64±0.48    |
| C20:4n-6       | 7.87±1.52  | 8.81±1.77    | 5.23±1.34##  | 9.12±1.86    | 10.43±2.01 | 6.16±1.22##  |
| C22:0          | 0.13±0.10  | 0.32±0.11    | 0.21±0.13    | 0.12±0.12    | 0.27±0.13  | 0.39±0.14    |
| C20:5n-3       | 0.09±0.02  | 0.11±0.02    | 2.59±0.45##  | 0.13±0.02    | 0.13±0.02  | 2.25±0.22##  |
| C22:1n-9       | 0.46±0.04  | 0.52±0.05    | 0.46±0.04    | 0.58±0.06    | 0.55±0.05  | 0.59±0.04    |
| C22:6n-3       | 3.77±0.44  | 4.50±0.38    | 10.28±1.02## | 5.17±0.53    | 4.14±0.62  | 8.79±0.94##  |
| Total SFA      | 28.72±1.82 | 33.84±2.33** | 34.37±2.02   | 32.52±2.42   | 34.13±2.15 | 34.95±2.21   |
| Total MUFA     | 36.72±1.77 | 32.67±1.87** | 30.28±1.92   | 30.38±1.73   | 32.38±1.85 | 29.77±1.76   |
| Total PUFA     | 34.56±2.01 | 33.49±2.33   | 35.35±1.35#  | 37.1±2.22#   | 33.49±2.62 | 35.28±2.51#  |
| Total n-6 PUFA | 29.44±1.79 | 28.55±1.89   | 22.35±1.62## | 31.17±1.89#  | 28.67±1.77 | 23.99±1.82## |
| Total n-3 PUFA | 5.12±0.92  | 4.94±0.66    | 13.00±1.32## | 5.93±0.62    | 4.82±0.66  | 11.29±1.13## |

60  
61  
62  
63  
64  
65  
66  
67  
68  
69  
70  
71

Results are presented as means ± SD

\**p* < 0.05, \*\**p* < 0.01 compared to Con group. #*p* < 0.05, ##*p* < 0.01 compared to HF group.

SFA, saturated fatty acids; MUFA, monounsaturated fatty acids; PUFA, polyunsaturated fatty acids; ND, not detected.

72  
73  
74  
75  
76  
77  
78  
79

80 **Supplemental Table 5.** Effect of different PCs treatment on Fatty acid composition in epididymis fat of the Mice

| Fatty acid (%)    | Con        | HF           | EPA/DHA-PC  | Soy-PC       | Egg-PC     | EPA/DHA-TG  |
|-------------------|------------|--------------|-------------|--------------|------------|-------------|
| C14:0             | 0.83±0.05  | 1.49±0.10    | 1.22±0.15   | 1.57±0.13    | 1.59±0.12  | 1.54±0.09   |
| C15:0             | 0.31±0.03  | 0.25±0.02    | 0.15±0.02   | 0.14±0.01    | 0.14±0.01  | 0.18±0.02   |
| C16:0             | 17.72±1.65 | 21.46±1.73** | 18.41±1.74  | 13.16±1.46## | 19.92±1.81 | 19.14±1.83  |
| C16:1n-9          | 4.57±0.43  | 4.90±.51     | 4.75±0.52   | 3.72±0.39    | 4.99±0.42  | 4.84±0.44   |
| C17:0             | 1.79±1.03  | 2.05±1.32    | 2.51±1.29   | 4.52±1.53    | 2.18±1.88  | 2.29±1.46   |
| C17:1             | 0.83±0.11  | 0.62±0.13    | 0.65±0.21   | 0.67±0.27    | 0.69±0.19  | 0.70±0.16   |
| C18:0             | 7.68±1.10  | 11.94±1.33** | 13.29±1.37  | 12.15±1.25   | 13.93±1.31 | 12.94±1.26  |
| C18:1n-9          | 31.97±2.17 | 33.35±2.28   | 31.58±2.06  | 32.20±1.98   | 33.54±2.31 | 32.62±1.95  |
| C18:2n-6          | 19.23±1.41 | 11.89±1.80** | 12.17±1.28  | 18.37±1.66## | 11.81±1.32 | 12.87±1.33  |
| C18:3n-6          | 0.59±0.06  | 0.37±0.04    | 0.23±0.03   | 0.37±0.04    | 0.34±0.04  | 0.27±0.03   |
| C18:3n-3          | 2.27±0.29  | 0.88±0.11**  | 0.77±0.31   | 1.09±0.39    | 0.89±0.20  | 0.82±0.19   |
| C20:1n-9          | 4.43±0.37  | 4.58±0.42    | 6.61±0.53   | 5.55±0.56    | 4.31±0.47  | 4.27±0.44   |
| C20:2n-6          | 2.68±0.38  | 2.62±0.32    | 2.17±0.28   | 2.51±0.26    | 2.45±0.39  | 2.74±0.58   |
| C20:3n-6          | 1.73±0.20  | 1.07±0.16    | 1.68±0.17   | 1.41±0.15    | 0.86±0.13  | 1.48±0.21   |
| C20:4n-6          | 1.02±0.13  | 1.05±0.13    | 0.77±0.12#  | 0.89±0.11    | 1.13±0.15  | 0.82±0.11#  |
| C22:0             | 0.47±0.03  | 0.24±0.02    | 0.32±0.04   | 0.48±0.03    | 0.24±0.03  | 0.25±0.02   |
| C20:5n-3          | 0.23±0.03  | 0.13±0.02    | 0.54±0.03## | 0.23±0.03    | 0.16±0.02  | 0.51±0.05## |
| C22:1n-9          | 0.90±0.10  | 0.65±0.11    | 0.77±0.10   | 0.7±0.09     | 0.47±0.08  | 0.66±0.17   |
| C22:6n-3          | 0.75±0.11  | 0.46±0.09    | 1.41±0.12## | 0.27±0.14    | 0.36±0.15  | 1.06±0.14## |
| Total SFA         | 28.80±1.79 | 37.43±2.33   | 35.9±2.42   | 32.02±2.19   | 38.00±2.79 | 36.34±2.63  |
| Total MUFA        | 42.70±2.86 | 44.10±3.01   | 44.36±2.77  | 42.84±2.79   | 44.00±3.41 | 43.09±2.84  |
| Total PUFA        | 28.50±1.65 | 18.47±1.57   | 19.74±1.82  | 25.14±1.89   | 18.00±1.64 | 20.57±1.89  |
| Total n-6<br>PUFA | 25.25±1.73 | 17.00±1.62   | 17.02±1.59  | 23.55±2.06   | 16.59±1.84 | 18.18±1.99  |
| Total n-3<br>PUFA | 3.25±0.33  | 1.47±0.29**  | 2.72±0.24## | 1.59±0.36    | 1.41±0.31  | 2.39±0.39## |

81  
82  
83  
84  
85  
86  
87  
88  
89  
90

Results are presented as means ± SD

\**p* < 0.05, \*\**p* < 0.01 compared to Con group. #*p* < 0.05, ##*p* < 0.01 compared to HF group.

SFA, saturated fatty acids; MUFA, monounsaturated fatty acids; PUFA, polyunsaturated fatty acids; ND, not detected.

91  
92  
93  
94  
95  
96  
97  
98  
99  
100

101

**Supplemental Table 6.** Primers used during the real-time PCR assay

---

| Gene         | Forward/reverse primer          |
|--------------|---------------------------------|
| IRS1         | 5'-ATGTCGCCAGTGGGAGATT-3'       |
|              | 5'-CTTCGGCAGTTGCGGTATA-3'       |
| IRS2         | 5'-GACGGCTGTTTCGCAATT-3'        |
|              | 5'-GGACGCCAAGCACAAGTA-3'        |
| PI3K         | 5'-CCTCTCCTTATAAAGCTCCTGGAA-3'  |
|              | 5'-GATCACAATCAAGAAGCTGTCGTAA-3' |
| AKT2         | 5'-TTCTACAACCAGGACCACGAGC-3'    |
|              | 5'-TGATGCTGAGGAAGAACCGATG-3'    |
| GYS2         | 5'-CCAGCTTGATAAGTTCAACA-3'      |
|              | 5'-ATCAGGCTTCCTCTTCAGCA-3'      |
| G6pase       | 5'-GAAGGCCAAGAGATGGTGTGA-3'     |
|              | 5'-TGCAGCTCTTGCGGTACATG-3'      |
| PEPCK        | 5'-CCCAGGAAGTGAGGAAGTTTGT-3'    |
|              | 5'-GGAGCCGTCGCAGATGTG-3'        |
| GLUT2        | 5'-CTGTCTGTGTCCAGCTTTGCA-3'     |
|              | 5'-CAAGCCACCCACCAAAGAAC-3'      |
| GLUT4        | 5'-ACTAAGAGCACCGAGACCAA-3'      |
|              | 5'-CTGCCC GAAAGAGTCTAAAG-3'     |
| TLR4         | 5'-CCGCTCTGGCATCATCTTCATTGT-3'  |
|              | 5'-CCATTCCAGGTAGGTGTTT-3'       |
| GRP120       | 5'-GCATAGGAGAAATCTCATGG-3'      |
|              | 5'-GAGTTGGCAAACGTGAAGGC-3'      |
| JNK          | 5'-TGACGCCTTATGTGGTGA-3'        |
|              | 5'-TGATGTATGGGTGCTGGAGA-3'      |
| NF-kB        | 5'-GTTGGGTCTGGGGATACTGA-3'      |
|              | 5'-AACCGTGGGGCATT TTTGT-3'      |
| IL-6         | 5'-AGCCAGAGTCCTTCAGAGAGAT-3'    |
|              | 5'-GCACTAGGTTTGCCGAGTAGA T-3'   |
| IL-1 $\beta$ | 5'-CTCCATGAGCTTTGTACAAGG-3'     |

---

|               |                            |
|---------------|----------------------------|
|               | 5'-TGCTGATGTACCAGTTGGGG-3' |
| TNF- $\alpha$ | 5'-CACCACGCTCTTCTGT-3'     |
|               | 5'-CTTTGAGATCCATCG-3       |
| IL-10         | 5'-GGCGCTGTCATCGATT-3'     |
|               | 5'-AGCTCTGTCTAGGTCC-3'     |

102

103

104

105

106 **Supplemental Table 7.** Correlation analysis between the IR related parameters with the relative abundance of gut

107 microbiota at genus level

|                             | HOMA-IR |       | Serum insulin |       | Fasting glucose |       |
|-----------------------------|---------|-------|---------------|-------|-----------------|-------|
|                             | r       | p     | r             | p     | r               | p     |
| Ileibacterium               | 0.517   | 0.020 | 0.380         | 0.098 | 0.675           | 0.001 |
| norank_f__Muribaculaceae    | 0.075   | 0.754 | 0.021         | 0.929 | 0.121           | 0.611 |
| Akkermansia                 | -0.671  | 0.001 | -0.522        | 0.018 | -0.766          | 0.000 |
| Lactobacillus               | -0.672  | 0.001 | -0.549        | 0.012 | -0.757          | 0.000 |
| Dubosiella                  | 0.483   | 0.031 | 0.671         | 0.001 | 0.240           | 0.307 |
| Bifidobacterium             | 0.353   | 0.127 | 0.326         | 0.161 | 0.431           | 0.058 |
| Coriobacteriaceae_UCG-002   | -0.457  | 0.043 | -0.301        | 0.198 | -0.560          | 0.010 |
| Clostridium_sensu_stricto_1 | -0.766  | 0.000 | -0.778        | 0.000 | -0.714          | 0.000 |
| Bacteroides                 | -0.441  | 0.052 | -0.426        | 0.061 | -0.430          | 0.058 |

108 Pearson correlation test was performed by SPSS 19.0 software; r, correlation coefficient; Statistical significance was set to

109  $p < 0.05$ 

110

111

112

113

114

115

116

117

118

119

120

121

122

123

124

125

126

127

128

129

130

131

132  
 133  
 134  
 135  
 136  
 137  
 138  
 139  
 140  
 141

142 **Supplemental Figure 1 .** Effects of PCs on microbial distributions of different groups at the genus level.

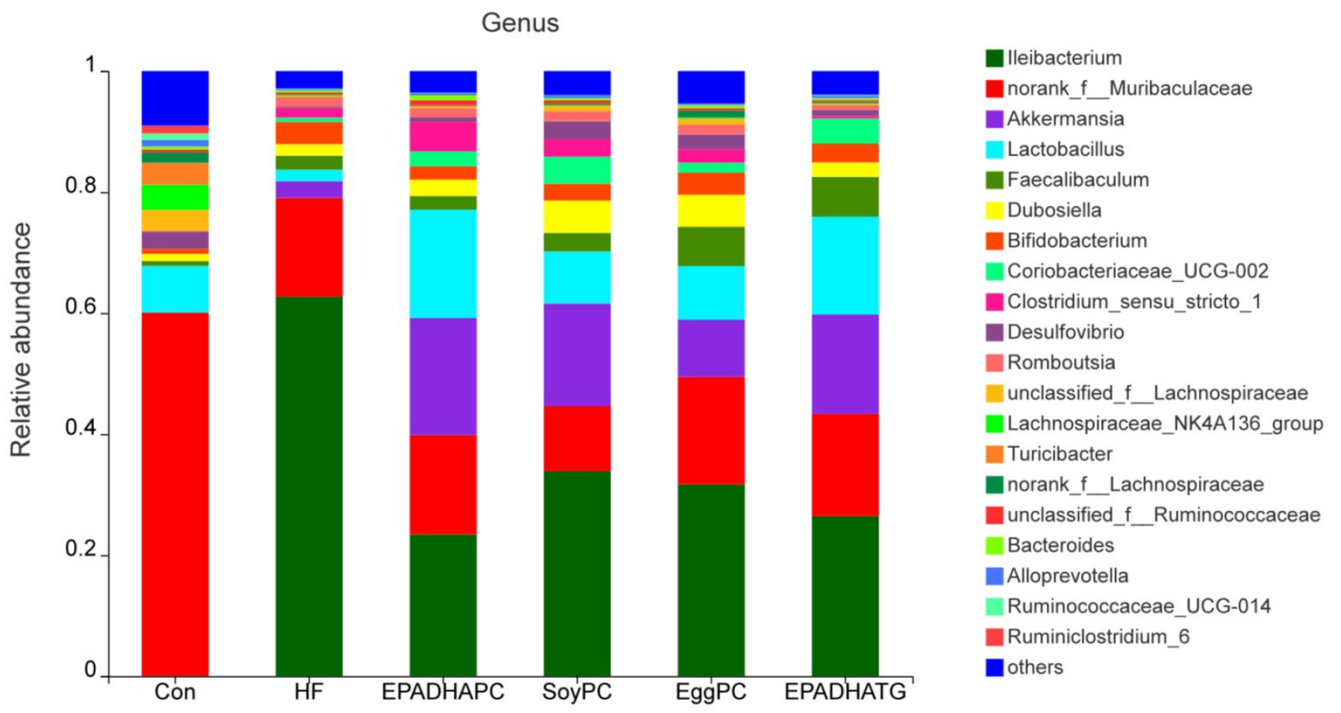

143  
 144  
 145  
 146
